# Supplementary material
Source: PubMed Central journal article supplement (PMC6336841)
Supplement: 41431_2018_284_MOESM1_ESM.pdf [file 41431_2018_284_MOESM1_ESM.pdf]

**Supplementary Table 1: Actionable (likely) pathogenic variants identified in 1,640 healthy individuals in the 59 ACMG genes**

| Phenotype                                                                    | MIM disorder | Typical age of onset | Gene   | Inheritance | RefSeq ID      | Pathogenic variants identified <sup>b</sup> |                         |                          | ACMG-AMP classification <sup>c</sup> |            |     |                   |      |     |     |
|------------------------------------------------------------------------------|--------------|----------------------|--------|-------------|----------------|---------------------------------------------|-------------------------|--------------------------|--------------------------------------|------------|-----|-------------------|------|-----|-----|
|                                                                              |              |                      |        |             |                | cDNA position                               | Protein change          | Nr of alleles identified | Conclusion                           | Categories |     |                   |      |     |     |
| Hereditary breast and ovarian cancer                                         | 604370       | Adult                | BRCA1  | AD          | NM_007300.3    | c.5566C>T                                   | p.Arg1856*              | 3                        | Pathogenic                           | PVS1       | PS4 | PP1               |      |     |     |
|                                                                              |              |                      |        |             |                | c.5329dup                                   | p.Gln1777fs             | 1                        | Pathogenic                           | PVS1       | PS4 | PP1               |      |     |     |
|                                                                              |              |                      |        |             |                | c.2685_2686del <sup>b</sup>                 | p.Pro897fs              | 1                        | Pathogenic                           | PVS1       | PS4 | PP1               |      |     |     |
|                                                                              | 612555       |                      | BRCA2  | AD          | NM_000059.3    | c.5576_5579del                              | p.Ile1859fs             | 1                        | Pathogenic                           | PVS1       | PS4 | PP1               |      |     |     |
|                                                                              |              |                      |        |             |                | c.7878G>C                                   | p.Trp2626Cys            | 1                        | Pathogenic                           | PS3        | PS4 | PM1               | PM5  | PP1 | PP3 |
|                                                                              |              |                      |        |             |                | c.9672dup <sup>b</sup>                      | p.Tyr3225fs             | 1                        | Pathogenic                           | PVS1       | PS4 | PP1               |      |     |     |
| Li-Fraumeni syndrome                                                         | 151623       | Child/Adult          | TP53   | AD          | NM_001126112.2 |                                             |                         |                          |                                      |            |     |                   |      |     |     |
| Peutz-Jeghers syndrome                                                       | 175200       | Child/Adult          | STK11  | AD          | NM_000455.4    |                                             |                         |                          |                                      |            |     |                   |      |     |     |
| Lynch syndrome                                                               | 120435       | Adult                | MLH1   | AD          | NM_001258271.1 |                                             |                         |                          |                                      |            |     |                   |      |     |     |
|                                                                              |              |                      |        |             |                | MSH2                                        | AD                      | NM_000251.2              |                                      |            |     |                   |      |     |     |
|                                                                              |              |                      | MSH6   | AD          | NM_001281493.1 |                                             |                         |                          | c.1444C>T                            | p.Arg482*  | 2   | Likely pathogenic | PVS1 | PM2 |     |
|                                                                              |              |                      |        |             |                | PMS2                                        | AD                      | NM_000535.6              |                                      |            |     |                   |      |     |     |
| Familial adenomatous polyposis coli                                          | 175100       | Child/Adult          | APC    | AD          | NM_001127511.2 |                                             |                         |                          |                                      |            |     |                   |      |     |     |
| MYH-associated polyposis                                                     | 608456       | Adult                | MUTYH  | AR          | NM_001128425.1 | c.1227_1228dup                              | p.Glu410fs              | 1                        | Likely pathogenic                    | PVS1       | PM2 |                   |      |     |     |
| Adenomas, multiple colorectal, FAP type 2                                    | 132600       |                      |        |             |                | c.1214C>T <sup>b</sup>                      | p.Pro405Leu             | 2                        | Likely pathogenic                    | PS3        | PM1 | PM2               | PP1  |     |     |
| Colorectal adenomatous polyposis with pilomatricomas                         |              |                      |        |             |                | c.1187G>A <sup>c</sup>                      | p.Gly396Asp             | 13                       | Pathogenic                           | PS3        | PS4 | PM1               | PP1  | PP3 |     |
|                                                                              |              |                      |        |             |                | c.1147del                                   | p.Ala385fs              | 3                        | Pathogenic                           | PVS1       | PS3 | PS4               | PP1  |     |     |
|                                                                              |              |                      |        |             |                | c.1105G>T <sup>b</sup>                      | p.Glu369* <sup>d</sup>  | 1                        | Likely pathogenic                    | PVS1       | PM2 |                   |      |     |     |
|                                                                              |              |                      |        |             |                | c.884C>T                                    | p.Pro295Leu             | 1                        | Likely pathogenic                    | PS3        | PM1 | PM2               | PP3  |     |     |
|                                                                              |              |                      |        |             |                | c.545G>A                                    | p.Arg182His             | 1                        | Likely pathogenic                    | PS3        | PM2 | PM5               |      |     |     |
|                                                                              |              |                      |        |             |                | c.536A>G <sup>c</sup>                       | p.Tyr179Cys             | 8                        | Pathogenic                           | PS3        | PS4 | PP1               |      |     |     |
|                                                                              |              |                      |        |             |                | c.325C>T                                    | p.Arg109Trp             | 1                        | Likely pathogenic                    | PS3        | PM2 | PP3               |      |     |     |
| Juvenile polyposis                                                           | 174900       | Child/Adult          | BMPR1A | AD          | NM_004329.2    |                                             |                         |                          |                                      |            |     |                   |      |     |     |
|                                                                              |              |                      | SMAD4  | AD          | NM_005359.5    |                                             |                         |                          |                                      |            |     |                   |      |     |     |
| Von Hippel-Lindau syndrome                                                   | 193300       | Child/Adult          | VHL    | AD          | NM_198156.2    |                                             |                         |                          |                                      |            |     |                   |      |     |     |
| Multiple endocrine neoplasia, type 1                                         | 131100       | Child/Adult          | MEN1   | AD          | NM_130801.2    |                                             |                         |                          |                                      |            |     |                   |      |     |     |
| Multiple endocrine neoplasia, type 2                                         | 171400       | Child/Adult          | RET    | AD          | NM_020975.4    |                                             |                         |                          |                                      |            |     |                   |      |     |     |
|                                                                              | 162300       |                      |        |             |                |                                             |                         |                          |                                      |            |     |                   |      |     |     |
| Familial medullary thyroid cancer                                            | 1552401      | Child/Adult          | RET    | AD          | NM_020975.4    |                                             |                         |                          |                                      |            |     |                   |      |     |     |
| PTEN hamartoma tumor syndrome                                                | 153480       | Child/Adult          | PTEN   | AD          | NM_000314.6    |                                             |                         |                          |                                      |            |     |                   |      |     |     |
| Retinoblastoma                                                               | 180200       | Child                | RB1    | AD          | NM_000321.2    |                                             |                         |                          |                                      |            |     |                   |      |     |     |
| Hereditary paraganglioma-pheochromocytoma syndrome                           | 168000       | Child/Adult          | SDHD   | AD          | NM_003002.3    |                                             |                         |                          |                                      |            |     |                   |      |     |     |
|                                                                              | 601650       |                      | SDHAF2 | AD          | NM_017841.2    |                                             |                         |                          |                                      |            |     |                   |      |     |     |
|                                                                              | 605373       |                      | SDHC   | AD          | NM_003001.3    |                                             |                         |                          |                                      |            |     |                   |      |     |     |
|                                                                              | 115310       |                      | SDHB   | AD          | NM_003000.2    |                                             |                         |                          |                                      |            |     |                   |      |     |     |
| Tuberous sclerosis complex                                                   | 191100       | Child                | TSC1   | AD          | NM_000368.4    |                                             |                         |                          |                                      |            |     |                   |      |     |     |
|                                                                              | 613254       |                      | TSC2   | AD          | NM_000548.4    | c.2903dup                                   | p.Ser969fs <sup>d</sup> | 1                        | Likely pathogenic                    | PVS1       | PM2 |                   |      |     |     |
| WT1-related Wilms tumor                                                      | 194070       | Child                | WT1    | AD          | NM_001198551.1 |                                             |                         |                          |                                      |            |     |                   |      |     |     |
| Neurofibromatosis, type 2                                                    | 101000       | Child/Adult          | NF2    | AD          | NM_000268.3    |                                             |                         |                          |                                      |            |     |                   |      |     |     |
| Ehlers-Danlos syndrome, type 4                                               | 130050       | Child/Adult          | COL3A1 | AD          | NM_000090.3    | c.1815+2T>C                                 | r.spl? <sup>d</sup>     | 1                        | Likely pathogenic                    | PVS1       | PM2 |                   |      |     |     |
| Marfan's syndrome                                                            | 154700       | Child/Adult          | FBN1   | AD          | NM_000138.4    |                                             |                         |                          |                                      |            |     |                   |      |     |     |
| Loeys-Dietz syndromes and familial thoracic aortic aneurysms and dissections | 609192       |                      | TGFBR1 | AD          | NM_001130916.2 |                                             |                         |                          |                                      |            |     |                   |      |     |     |
|                                                                              | 608967       |                      | TGFBR2 | AD          | NM_003242.5    |                                             |                         |                          |                                      |            |     |                   |      |     |     |
|                                                                              | 610168       |                      | SMAD3  | AD          | NM_001145103.1 |                                             |                         |                          |                                      |            |     |                   |      |     |     |
|                                                                              | 610380       |                      | ACTA2  | AD          | NM_001613.2    |                                             |                         |                          |                                      |            |     |                   |      |     |     |
|                                                                              | 613795       |                      | MYH11  | AD          | NM_001040114.1 |                                             |                         |                          |                                      |            |     |                   |      |     |     |
| Hypertrophic cardiomyopathy, dilated cardiomyopathy                          | 115197       | Child/Adult          | MYBPC3 | AD          | NM_000256.3    | c.1831G>A                                   | p.Glu611Lys             | 3                        | Likely pathogenic                    | PM1        | PM2 | PP2               | PP3  | PP5 |     |
|                                                                              |              |                      |        |             |                | c.1468G>A                                   | p.Gly490Arg             | 3                        | Likely pathogenic                    | PM1        | PM2 | PP2               | PP3  | PP5 |     |
|                                                                              |              |                      |        |             |                | c.442G>A                                    | p.Gly148Arg             | 1                        | Likely pathogenic                    | PM1        | PM2 | PP2               | PP5  |     |     |
|                                                                              | 192600       |                      | MYH7   | AD          | NM_000257.3    | c.2644C>T                                   | p.Gln882* <sup>d</sup>  | 1                        | Likely pathogenic                    | PVS1       | PM2 |                   |      |     |     |
|                                                                              |              |                      |        |             | c.2389G>A      | p.Ala797Thr                                 | 1                       | Pathogenic               | PS3                                  | PS4        | PM5 | PP1               | PP2  |     |     |

Supplementary Table 1 continued

| Phenotype                                             | MIM disorder | Typical age of onset | Gene           | Inheritance | RefSeq ID      | Pathogenic variants identified <sup>a</sup> |                          |                          | ACMG-AMP classification <sup>e</sup> |            |     |     |     |
|-------------------------------------------------------|--------------|----------------------|----------------|-------------|----------------|---------------------------------------------|--------------------------|--------------------------|--------------------------------------|------------|-----|-----|-----|
|                                                       |              |                      |                |             |                | cDNA position                               | Protein change           | Nr of alleles identified | Conclusion                           | Categories |     |     |     |
| Hypertrophic cardiomyopathy, dilated cardiomyopathy   | 601494       | Child/Adult          | <i>TNNI2</i>   | AD          | NM_001276346.1 |                                             |                          |                          |                                      |            |     |     |     |
|                                                       | 613690       |                      | <i>TNNI3</i>   | AD          | NM_000363.4    | c.354del                                    | p.Thr119fs <sup>d</sup>  | 1                        | Likely pathogenic                    | PVS1       | PM2 |     |     |
|                                                       | 115196       |                      | <i>TPM1</i>    | AD          | NM_001018008.1 |                                             |                          |                          |                                      |            |     |     |     |
|                                                       | 608751       |                      | <i>MYL3</i>    | AD          | NM_000258.2    |                                             |                          |                          |                                      |            |     |     |     |
|                                                       | 612098       |                      | <i>ACTC1</i>   | AD          | NM_005159.4    |                                             |                          |                          |                                      |            |     |     |     |
|                                                       | 600858       |                      | <i>PRKAG2</i>  | AD          | NM_016203.3    |                                             |                          |                          |                                      |            |     |     |     |
|                                                       | 301500       |                      | <i>GLA</i>     | XLD         | NM_000169.2    | c.427G>A                                    | p.Ala143Thr              | 2                        | Likely Pathogenic                    | PS3        | PM2 | PM5 | PP5 |
|                                                       | 608758       |                      | <i>MYL2</i>    | AD          | NM_000432.3    | c.403-1G>C                                  | r.spl?                   | 1                        | Pathogenic                           | PVS1       | PS3 | PM2 |     |
| 115200                                                |              | <i>LMNA</i>          | AD             | NM_170707.3 |                |                                             |                          |                          |                                      |            |     |     |     |
| Catecholaminergic polymorphic ventricular tachycardia | 604772       | Child/Adult          | <i>RYR2</i>    | AD          | NM_001035.2    |                                             |                          |                          |                                      |            |     |     |     |
| Arrhythmic right ventricular cardiomyopathy           | 609040       | Child/Adult          | <i>PKP2</i>    | AD          | NM_004572.3    |                                             |                          |                          |                                      |            |     |     |     |
|                                                       | 607450       |                      | <i>DSP</i>     | AD          | NM_001008844.2 | c.85G>T                                     | p.Glu29* <sup>d</sup>    | 1                        | Likely pathogenic                    | PVS1       | PM2 |     |     |
|                                                       |              |                      |                |             |                | c.4518del                                   | p.Arg1506fs <sup>d</sup> | 1                        | Likely pathogenic                    | PVS1       | PM2 |     |     |
|                                                       |              |                      |                |             |                | c.6336del                                   | p.Asn2114fs <sup>d</sup> | 1                        | Likely pathogenic                    | PVS1       | PM2 |     |     |
|                                                       | 610476       |                      | <i>DSC2</i>    | AD          | NM_024422.4    |                                             |                          |                          |                                      |            |     |     |     |
|                                                       | 604400       |                      | <i>TMEM43</i>  | AD          | NM_024334.2    |                                             |                          |                          |                                      |            |     |     |     |
|                                                       | 610193       |                      | <i>DSG2</i>    | AD          | NM_001943.4    |                                             |                          |                          |                                      |            |     |     |     |
|                                                       | 192500       | Child/Adult          | <i>KCNQ1</i>   | AD          | NM_000218.2    | c.961C>T                                    | p.Gln321* <sup>d</sup>   | 1                        | Likely pathogenic                    | PVS1       | PM2 |     |     |
| Romano-Ward long QT syndromes 1, 2 and 3              |              |                      |                |             |                | c.1066C>T                                   | p.Gln356*                | 1                        | Likely pathogenic                    | PVS1       | PM2 |     |     |
|                                                       |              |                      |                |             |                | c.1124_1127del                              | p.Ile375fs               | 1                        | Likely pathogenic                    | PVS1       | PM2 |     |     |
|                                                       | 613688       |                      | <i>KCNH2</i>   | AD          | NM_000238.3    | c.2254C>T                                   | p.Arg752Trp              | 1                        | Likely pathogenic                    | PS3        | PM1 | PM2 | PP2 |
|                                                       | 601144       |                      | <i>SCN5A</i>   | AD          | NM_198056.2    | c.4999G>A                                   | p.Val1667Ile             | 1                        | Likely pathogenic                    | PM1        | PM2 | PP1 | PP2 |
|                                                       | 603830       |                      |                |             |                | c.4978A>G                                   | p.Ile1660Val             | 1                        | Pathogenic                           | PS3        | PM1 | PM2 | PP1 |
|                                                       |              |                      |                |             |                | c.3956G>T                                   | p.Gly1319Val             | 1                        | Pathogenic                           | PS3        | PM1 | PM2 | PP1 |
|                                                       |              |                      |                |             |                | c.3911C>T                                   | p.Thr1304Met             | 1                        | Pathogenic                           | PS3        | PM1 | PM2 | PP1 |
|                                                       |              |                      |                |             |                | c.80G>A                                     | p.Arg27His               | 1                        | Pathogenic                           | PS3        | PM1 | PM2 | PP1 |
| Familial hypercholesterolemia                         | 143890       | Child/ Adult         | <i>LDLR</i>    | AD          | NM_000527.4    |                                             |                          |                          |                                      |            |     |     |     |
|                                                       |              |                      | <i>APOB</i>    | AD          | NM_000384.2    | c.10580G>A <sup>c</sup>                     | p.Arg3527Gln             | 3                        | Pathogenic                           | PS3        | PS4 | PM5 | PP1 |
|                                                       |              |                      |                |             |                | c.10579C>T                                  | p.Arg3527Trp             | 1                        | Likely pathogenic                    | PS3        | PM2 | PM5 | PP2 |
| 603776                                                |              | <i>PCSK9</i>         | AD             | NM_174936.3 |                |                                             |                          |                          |                                      |            |     |     |     |
| Wilson disease                                        | 277900       | Child                | <i>ATP7B</i>   | AR          | NM_000053.2    | c.3955C>T                                   | p.Arg1319*               | 1                        | Likely pathogenic                    | PVS1       | PM2 |     |     |
|                                                       |              |                      |                |             |                | c.3008C>T                                   | p.Ala1003Val             | 1                        | Likely pathogenic                    | PM1        | PM2 | PM3 |     |
|                                                       |              |                      |                |             |                | c.2304dup                                   | p.Met769fs               | 1                        | Likely pathogenic                    | PVS1       | PM2 |     |     |
|                                                       |              |                      |                |             |                | c.1708-1G>C                                 | r.spl?                   | 1                        | Likely pathogenic                    | PVS1       | PM2 |     |     |
|                                                       |              |                      |                |             |                | c.19_20del                                  | p.Gln7fs                 | 1                        | Likely pathogenic                    | PVS1       | PM2 |     |     |
| Malignant hyperthermia susceptibility                 | 145600       | Child/ Adult         | <i>CACNA1S</i> | AD          | NM_000069.2    |                                             |                          |                          |                                      |            |     |     |     |
|                                                       |              |                      | <i>RYR1</i>    | AD          | NM_000540.2    | c.1589G>A                                   | p.Arg530His              | 2                        | Likely pathogenic                    | PS3        | PM1 | PM2 | PP2 |
|                                                       |              |                      |                |             |                | c.14545G>A                                  | p.Val4849Ile             | 1                        | Likely pathogenic                    | PS3        | PM1 | PM2 | PP1 |
| Ornithine carbamoyltransferase deficiency             | 311250       |                      | <i>OTC</i>     | XLR         | NM_000531.5    |                                             |                          |                          |                                      |            |     |     |     |

<sup>a</sup> Mutation nomenclature is provided according to HGVS recommendations (Den Dunnen et al. *Hum Mutat.* 2016, 37: 564-569).

<sup>b</sup> Dutch founder mutation.

<sup>c</sup> European founder mutation.

<sup>d</sup> Variant was not previously described in literature. It is however a loss-of-function variant in a gene exerting its pathogenic effect by haploinsufficiency.

<sup>e</sup> Variant pathogenicity is evaluated according to ACMG-AMP guidelines (Richards et al. *Genet Med.* 2015, 17:405-424).
